# Supplementary material for: Sox2 overexpression alleviates noise-induced hearing loss by inhibiting inflammation-related hair cell apoptosis
Source: Springer Nature journal article supplement (doi:10.1186/s12974-022-02414-0), 2022-02-28
Supplement: 12974_2022_2414_MOESM1_ESM.pdf [file 12974_2022_2414_MOESM1_ESM.pdf]

## Supplementary information

### Supplementary Table 1 Primers used in qPCR.

| Gene            | Forward Primers (5'-3') | Reverse Primers (5'-3') |
|-----------------|-------------------------|-------------------------|
| Prka $\alpha$ 1 | GTCAAAGCCGACCCAATGATA   | CGTACACGCAAATAATAGGGGTT |
| Caspase 3       | ATGGAGAACAACAAAACCTCAGT | TTGCTCCCATGTATGGTCTTTAC |
| Caspase 8       | TGCTTGACTACATCCCACAC    | TGCAGTCTAGGAAGTTGACCA   |
| Caspase 9       | TCCTGGTACATCGAGACCTTG   | AAGTCCCTTTTCGCAGAAACAG  |
| Ripk1           | GAAGACAGACCTAGACAGCGG   | CCAGTAGCTTCACTACTCGAC   |
| Ripk3           | TCTGTCAAGTTATGGCCTACTGG | GGAACACGACTCCGAACCC'    |
| Tnf             | GACGTGGAAGTGGCAGAAAGAG  | TTGGTGGTTTGTGAGTGTGAG   |
| Il-1 $\beta$    | GCAACTGTTCTGAAGTCAACT   | ATCTTTTGGGGTCCGTCAACT'  |
| Il-6            | TAGTCCTTCCACCCCAATTTCC  | TTGGTCCTTAGCCACTCCTTC   |
| Aif             | TCCAGAGGCCGAAACAGAG     | CATTTTGCCCCCTGATGAACC   |
| Endo G          | TTCCGCGAGGATGACTCTGT    | CACCTGAGGCGCTACGTTG     |
| Bax             | TGAAGACAGGGGCCTTTTTG    | AATTCGCCGGAGACTCG       |
| Actb            | GGCTGTATTCCCCTCCATCG    | CCAGTTGGTAACAATGCCATGT  |

### Supplementary Table 2 Primers used in genotyping.

| Genes               | Primers (5'-3')             |
|---------------------|-----------------------------|
| Sox2OE Wild Type F  | AGTCGCTCTGAGTTGTTATCAG      |
| Sox2OE Wild Type R  | TGAGCATGTCTTTAATCTACCTCGATG |
| Sox2OE Mutant F     | CCAGTAGACTGCACATGGCCC       |
| Sox2OE Mutant R     | GCCATACGGGAAGCAATAGCATG     |
| PrestinCreER 1      | CACAAGTTGTGAATGACCTC        |
| PrestinCreER 2      | TAACTGCTAGCATTTCCCTT        |
| PrestinCreER 3      | GTAAAGAGCGTAATCTGGAACA      |
| Atoh1CreER Mutant F | GCGGTCTGGCAGTAAAACTATC      |
| Atoh1CreER Mutant R | GTGAAACAGCATTGCTGTCATT      |

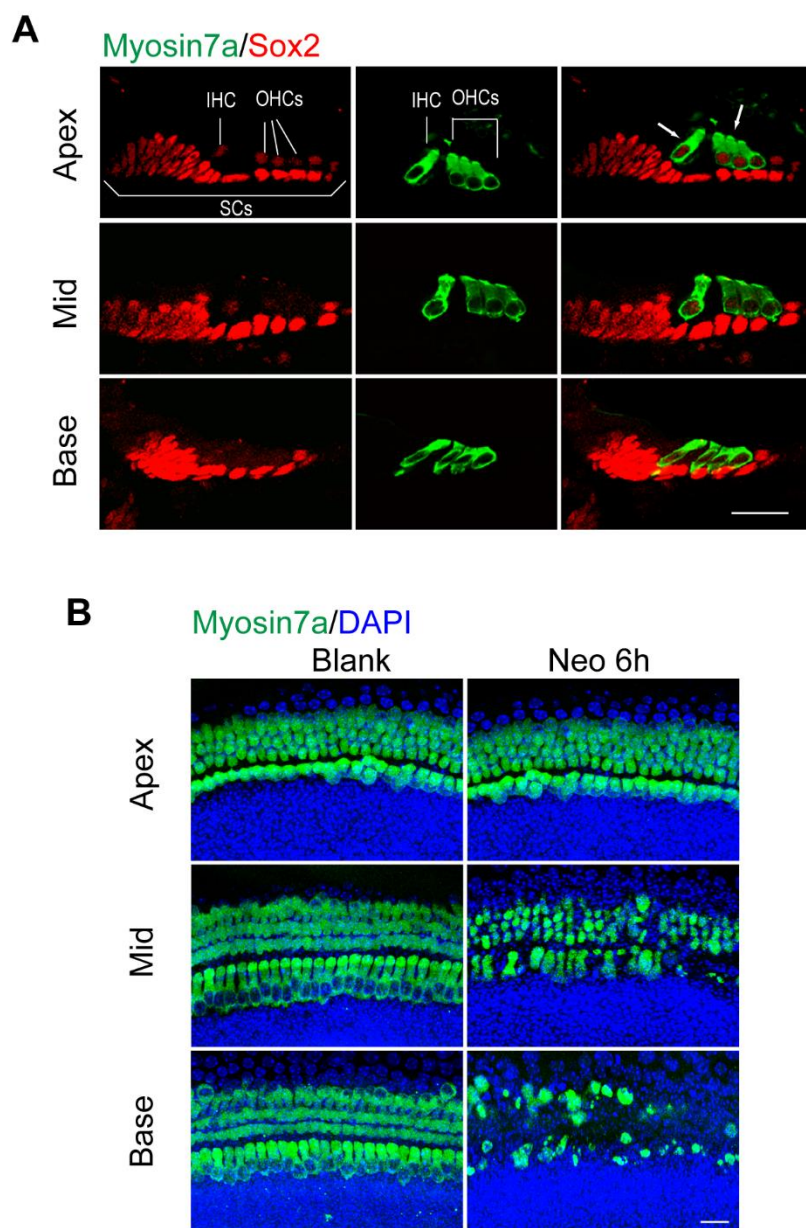**Figure S1**

**Cochlear HC sensitivity to ototoxic drugs increased from the apical to basal turns.**

**(A)** Images of cochlear cross-sections (orthogonal views) showing endogenous Sox2 expression in cochlear HCs and supporting cells in P2 mice. **(B)** Cochlear epithelia from P2 mice (wild type) were cultured and treated with 1 mM neomycin for 6 h, allowed to recover for 24 h, then fixed for Myosin7a immunofluorescence analysis. Scale bars: 20  $\mu$ m.
